# Supplementary material for: Effect of Biofunctional Green Synthesized MgO-Nanoparticles on Oxidative-Stress-Induced Tissue Damage and Thrombosis
Source: MDPI journal article supplement (doi:10.3390/molecules27165162), 2022-08-12
Supplement: s1 [file s1]

## Supplementary data

### S1

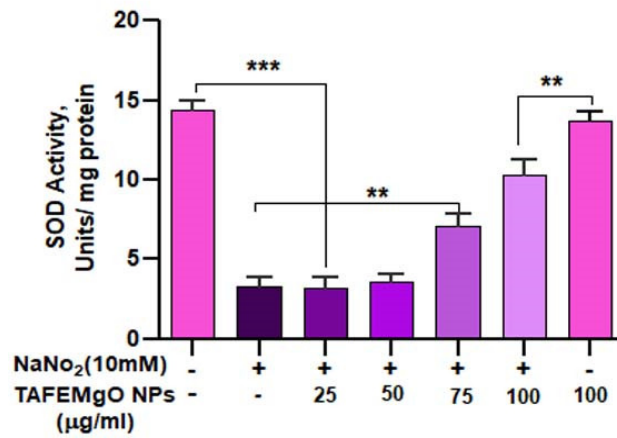

**Figure S1.** Super oxide dismutase (SOD) activity: Prior to treatment with NaNO<sub>2</sub> (10 mM), RBCs were pre-incubated for 10 min with various doses (25-100 g/mL) of TAFEMgO NPs at 37 °C. The results are expressed in average enzyme units per mg protein and are presented as mean SEM (n = 3).

### S2

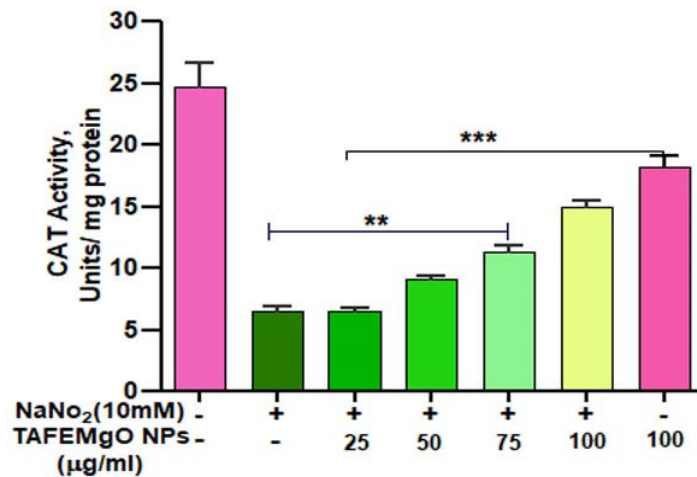

**Figure S2.** Catalase (CAT) activity: Prior to treatment with NaNO<sub>2</sub> (10 mM), RBCs were pre-incubated for 10 min with various doses (25-100 g/mL) of TAFEMgO NPs at 37 °C. The results are expressed in average enzyme units per mg protein and are presented as mean SEM (n = 3).

### S3

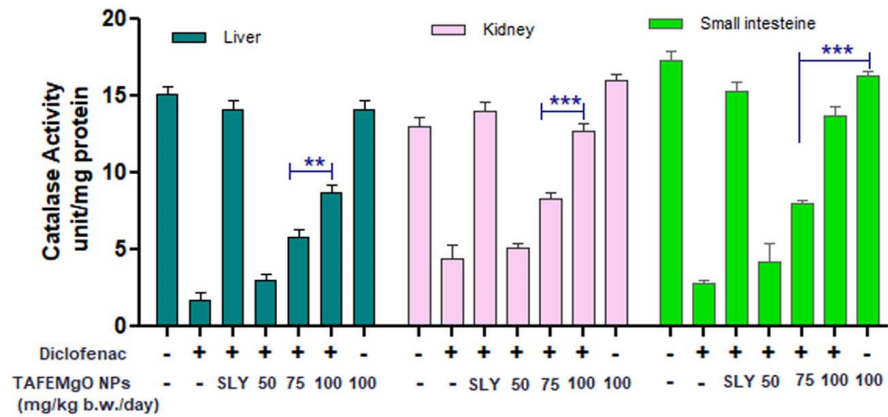

**Figure S3.** Effect of TAFEMgO NPs on diclofenac-induced oxidative stress in the liver, Kidney, small intestine: Superoxide dismutase: Control, Diclofenac (50 mg/kg b.w./day), SLY + Diclofenac (25 mg/kg b.w./day) TAFEMgO NPs + Diclofenac (50 mg/kg b.w./day) TAFEMgO NPs + Diclofenac (75 mg/kg b.w./day) TAFEMgO NPs + Diclofenac (100 mg/kg b.w./day) and TAFEMgO NPs alone (100 mg/kg b.w./day). In comparison to the toxicity control group, the data is presented as mean (n = 3) SEM. To represent the data, SEM mean (n = 3) was used.

### S4

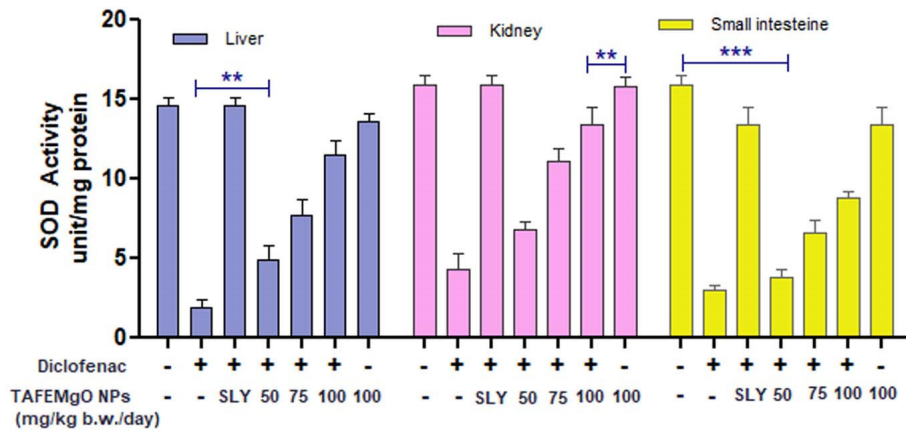

**Figure S4.** Effect of TAFEMgO NPs on diclofenac-induced oxidative stress in the liver, Kidney, small intestine: Catalase: Control, Diclofenac (50 mg/kg b.w./day), SLY + Diclofenac (25 mg/kg b.w./day) TAFEMgO NPs + Diclofenac (50 mg/kg b.w./day) TAFEMgO NPs + Diclofenac (75 mg/kg b.w./day) TAFEMgO NPs + Diclofenac (100 mg/kg b.w./day) and TAFEMgO NPs alone (100 mg/kg b.w./day). In comparison to the toxicity control group, the data is presented as mean (n = 3) SEM. To represent the data, SEM mean (n = 3) was used.
